# Supplementary material
Source: Springer Nature journal article supplement (https://www.springermedizin.de/resource/supplementary/12885_2011_3057_MOESM3_ESM.pdf/9464184)

**A**

Cytoplasmic Staining

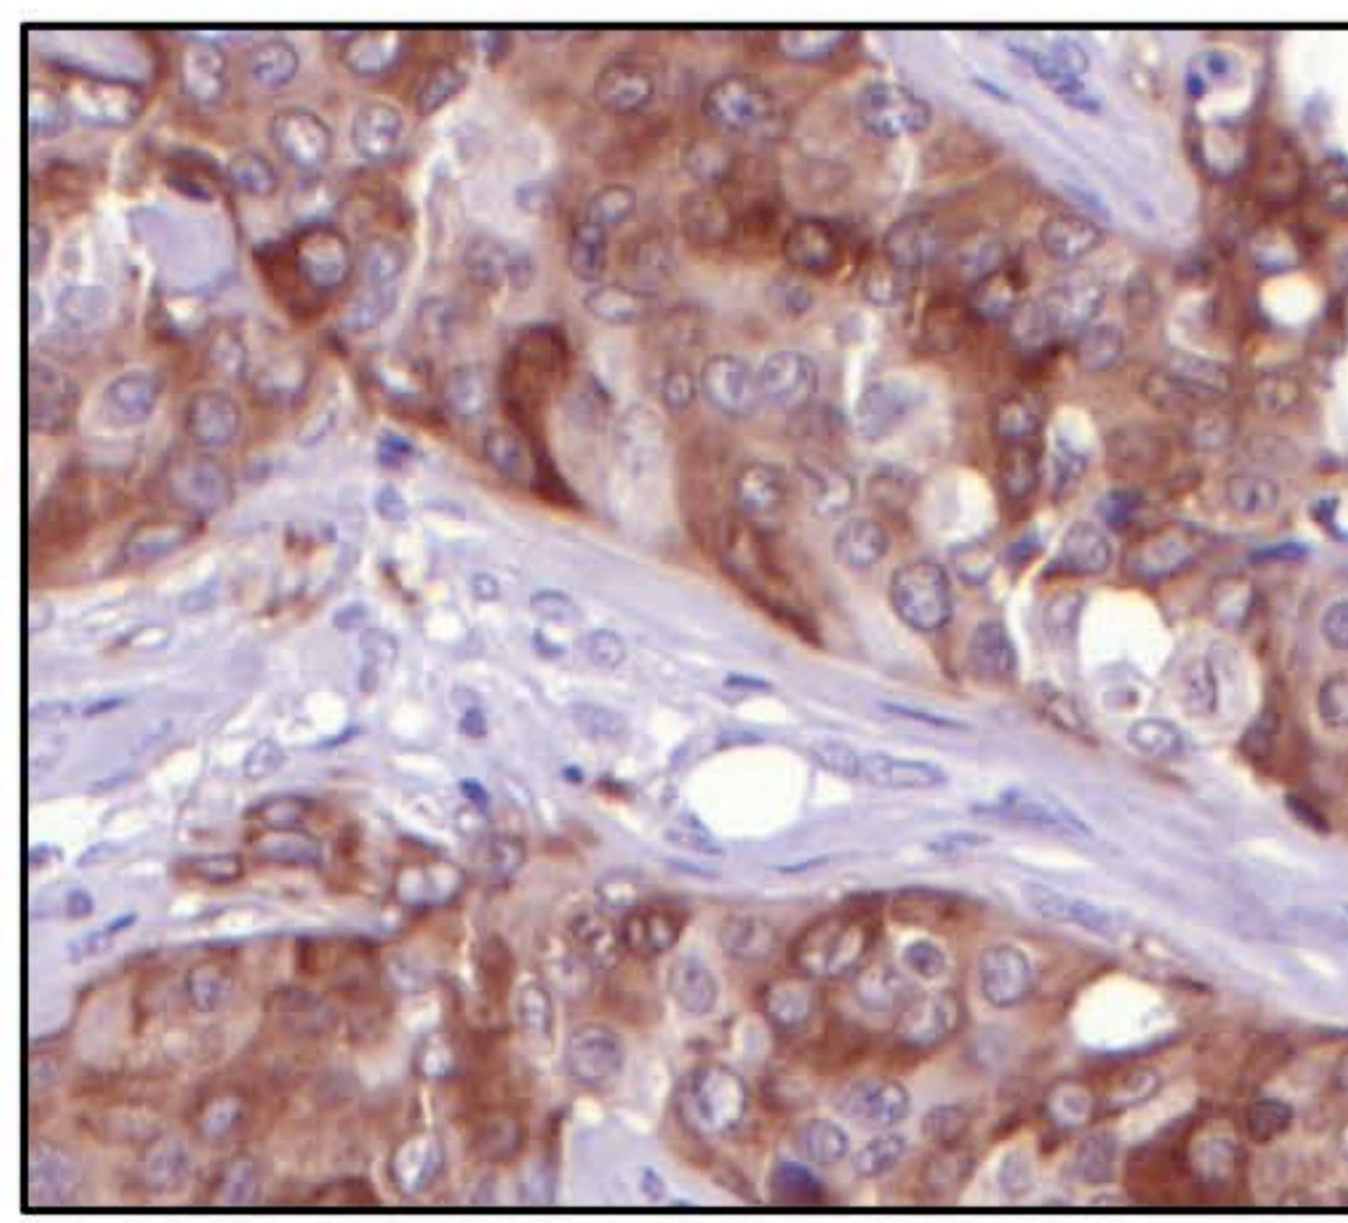

Nuclear Staining

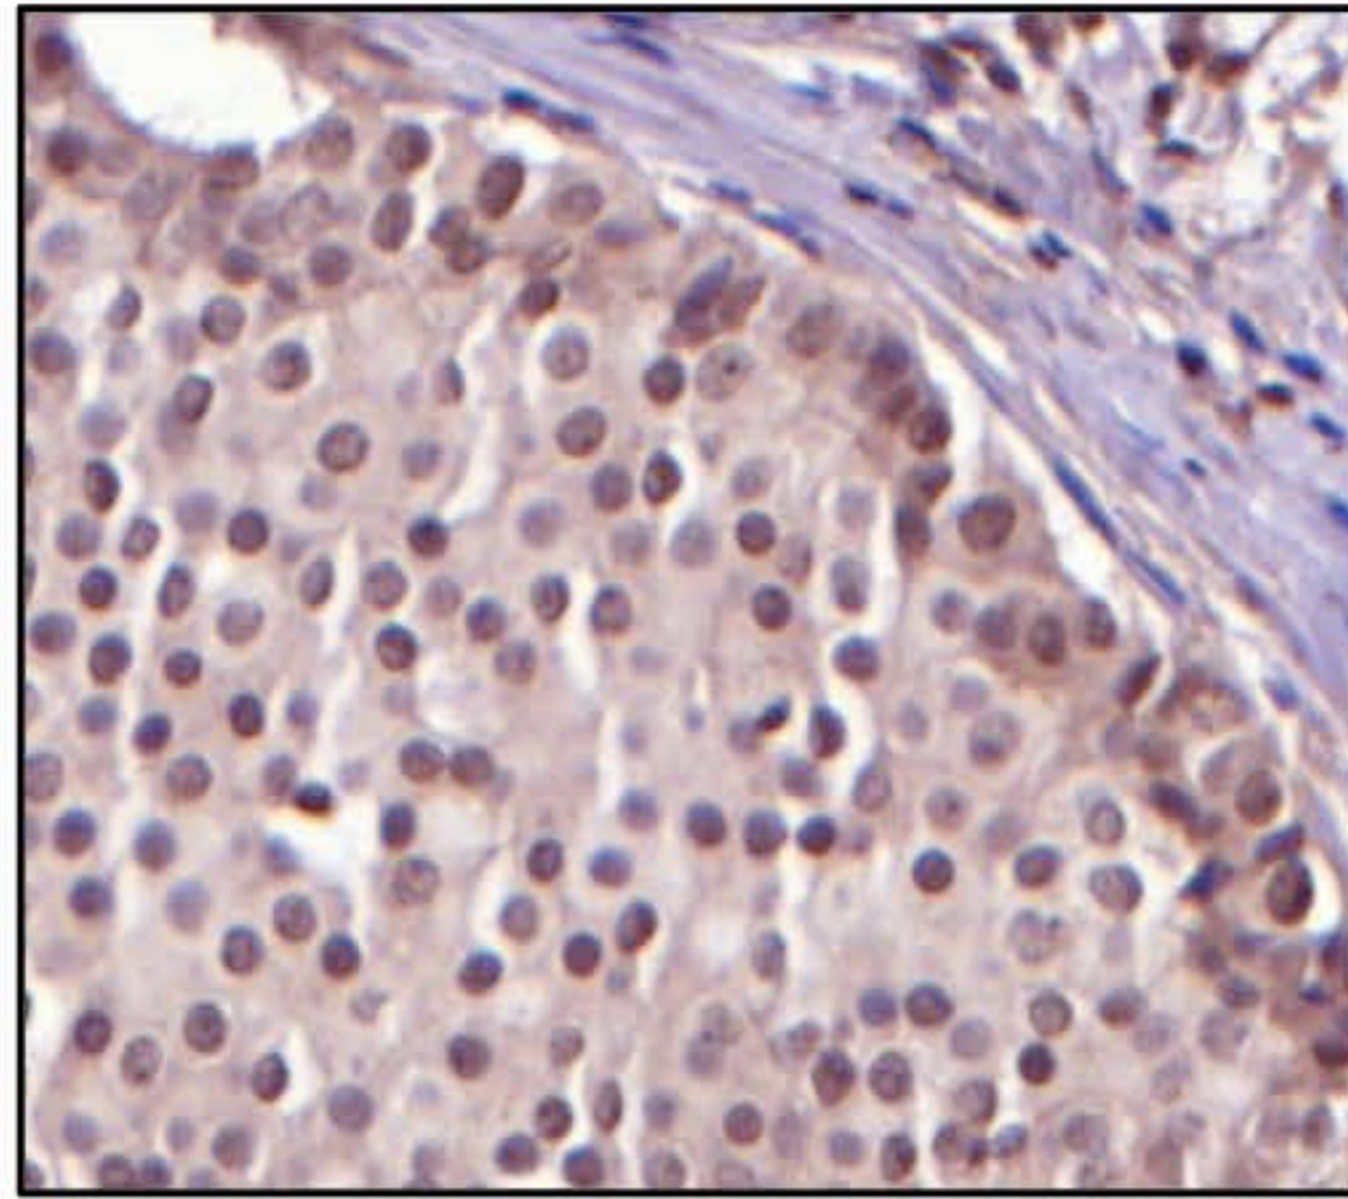**B**

3+

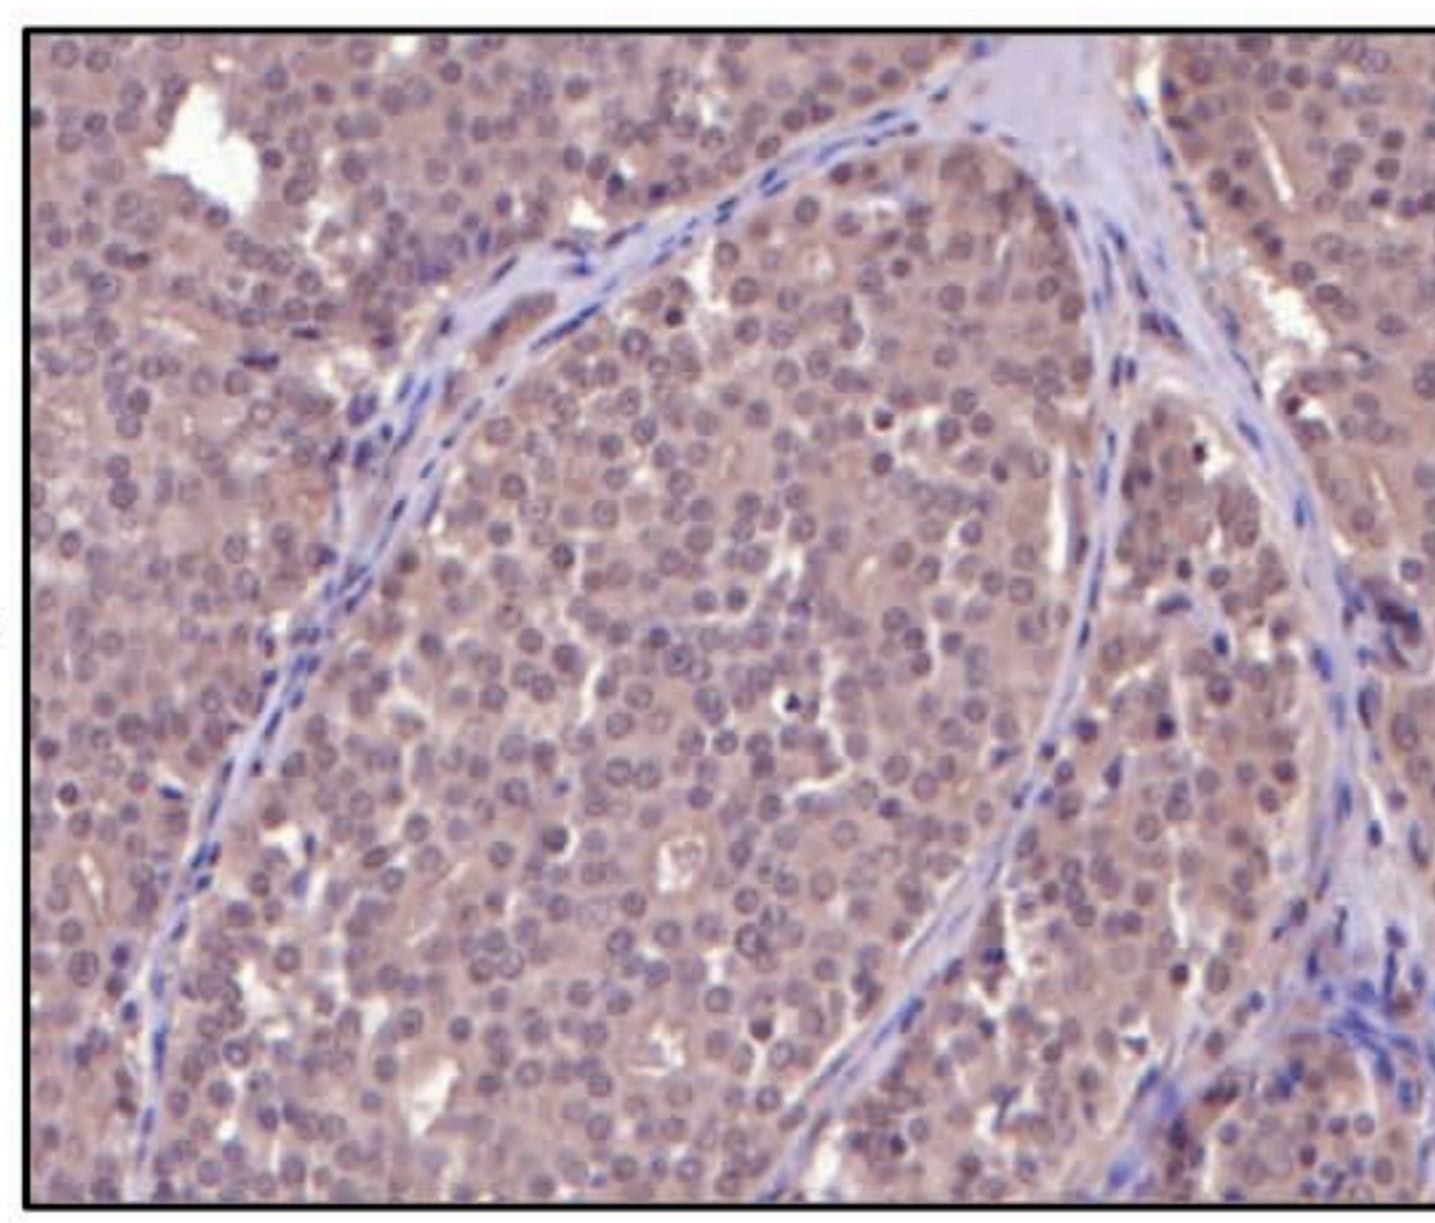

2+

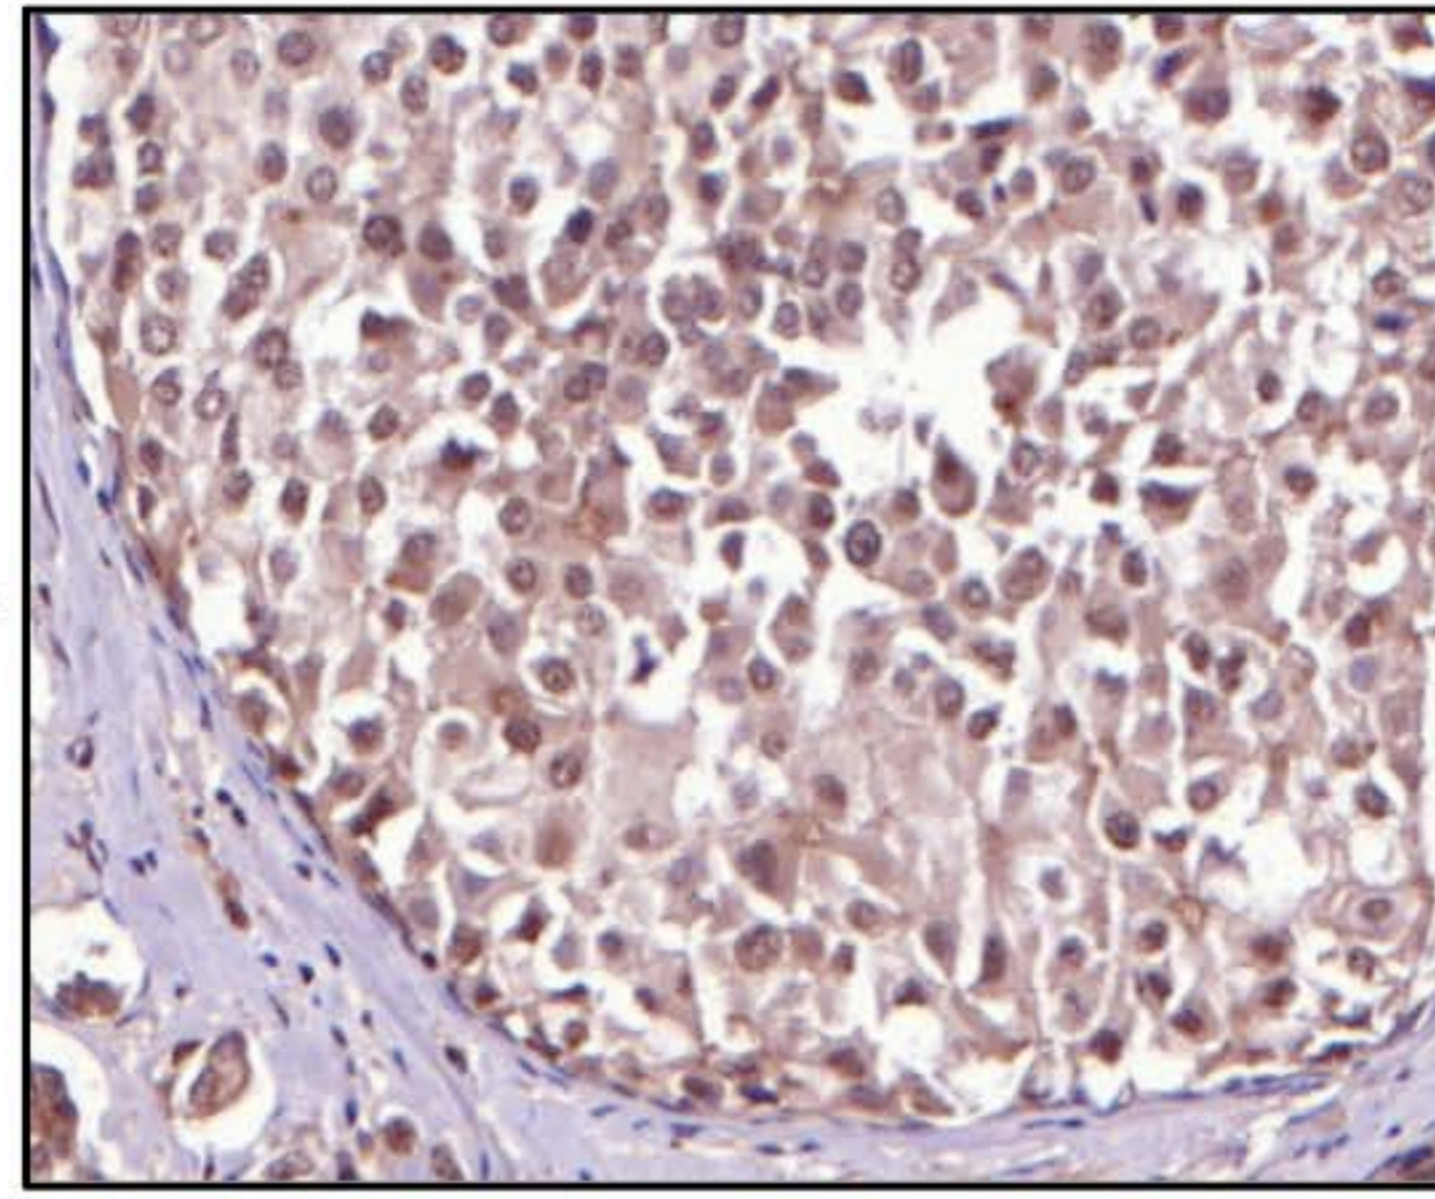

1+

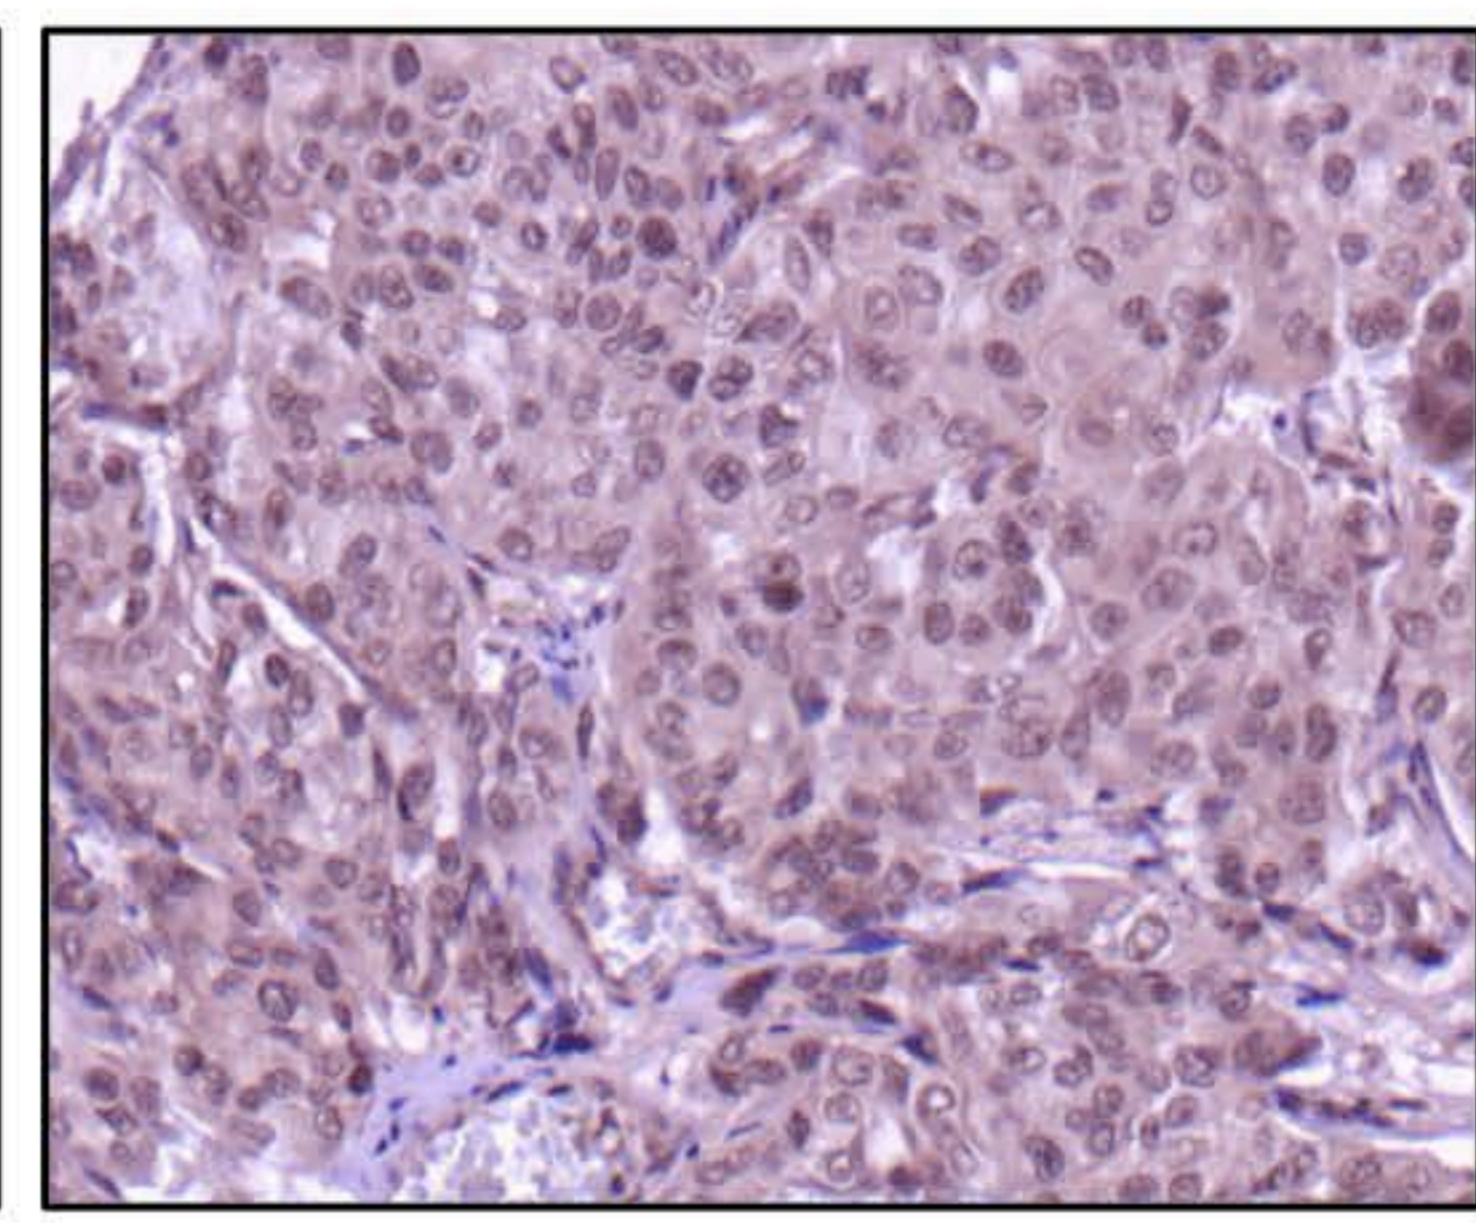

0

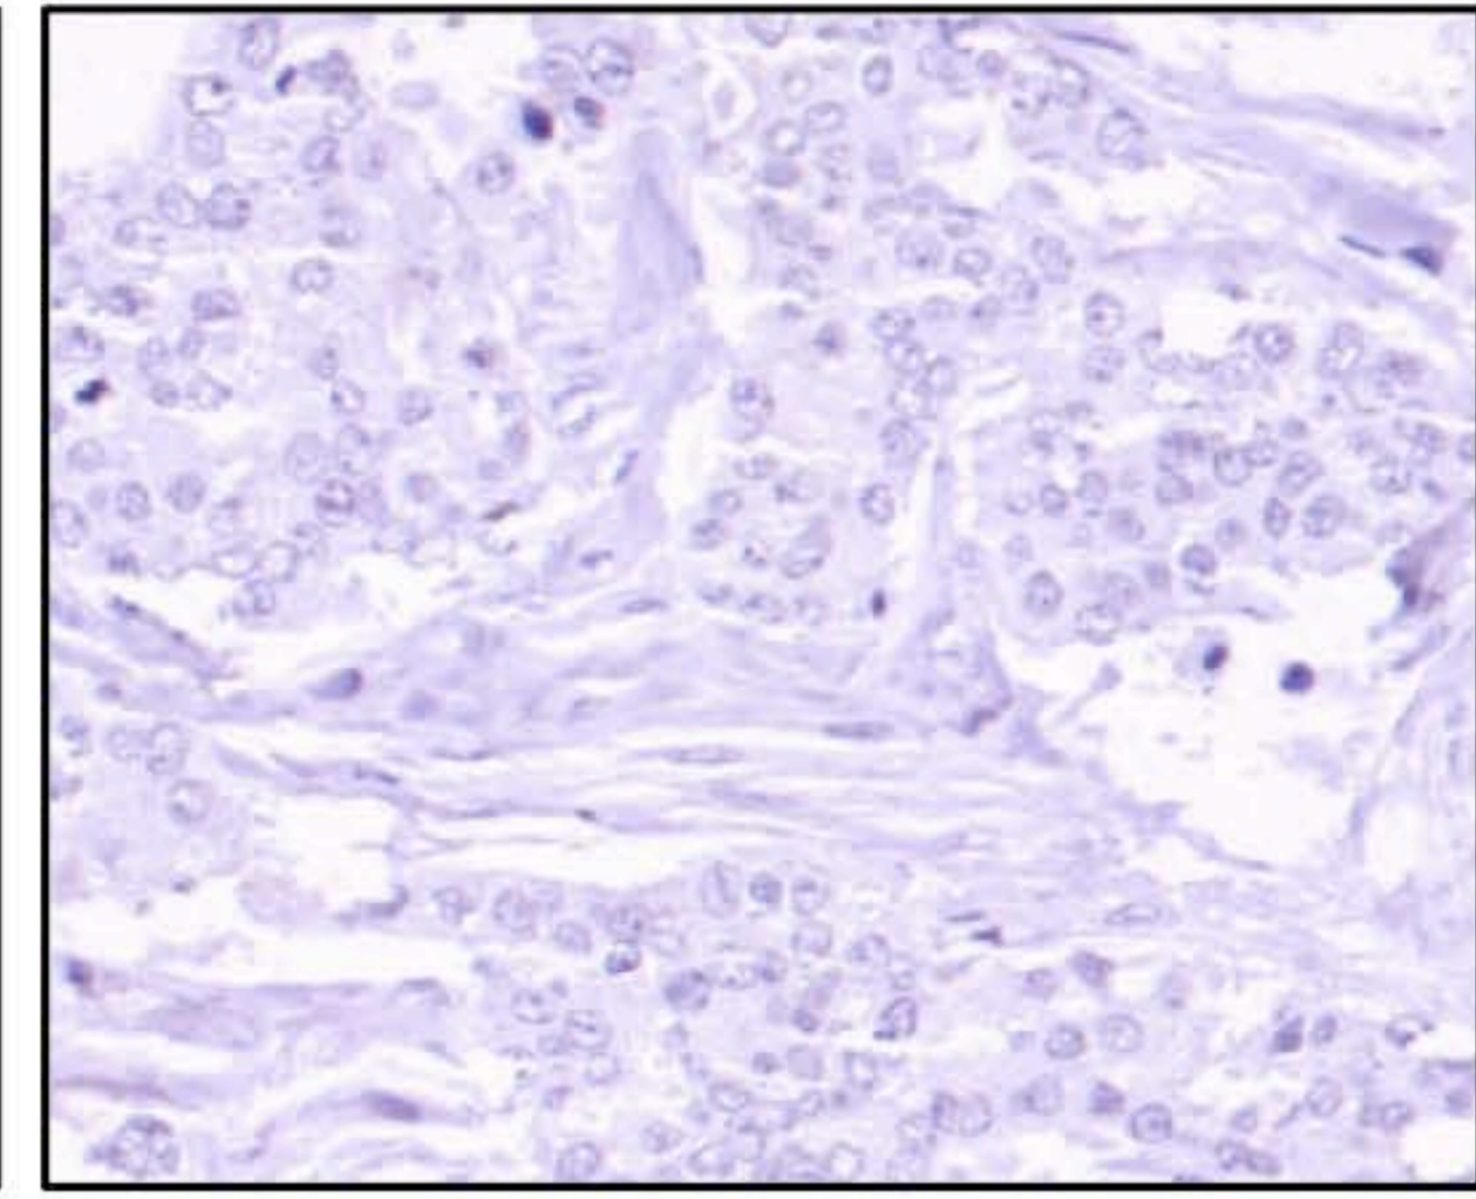**C**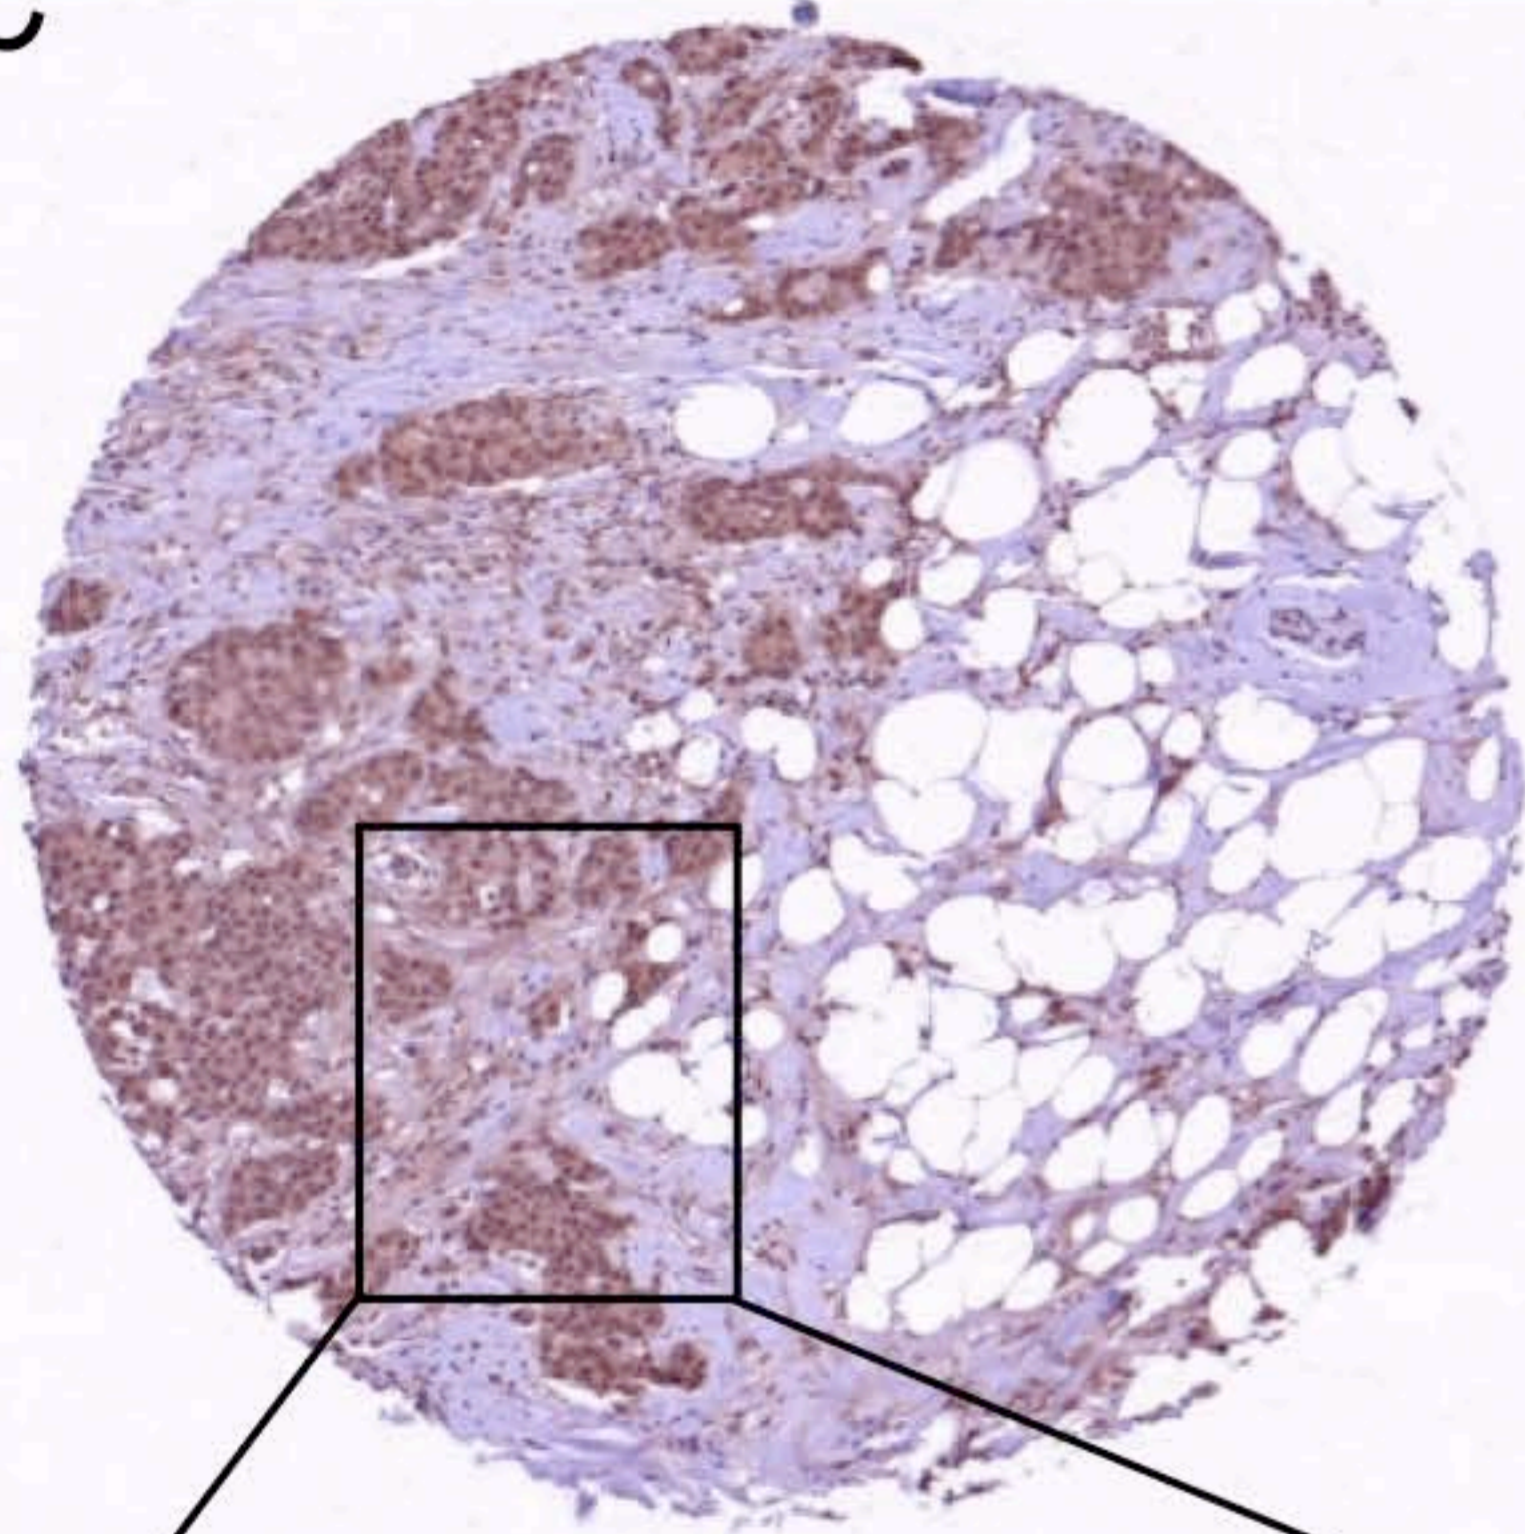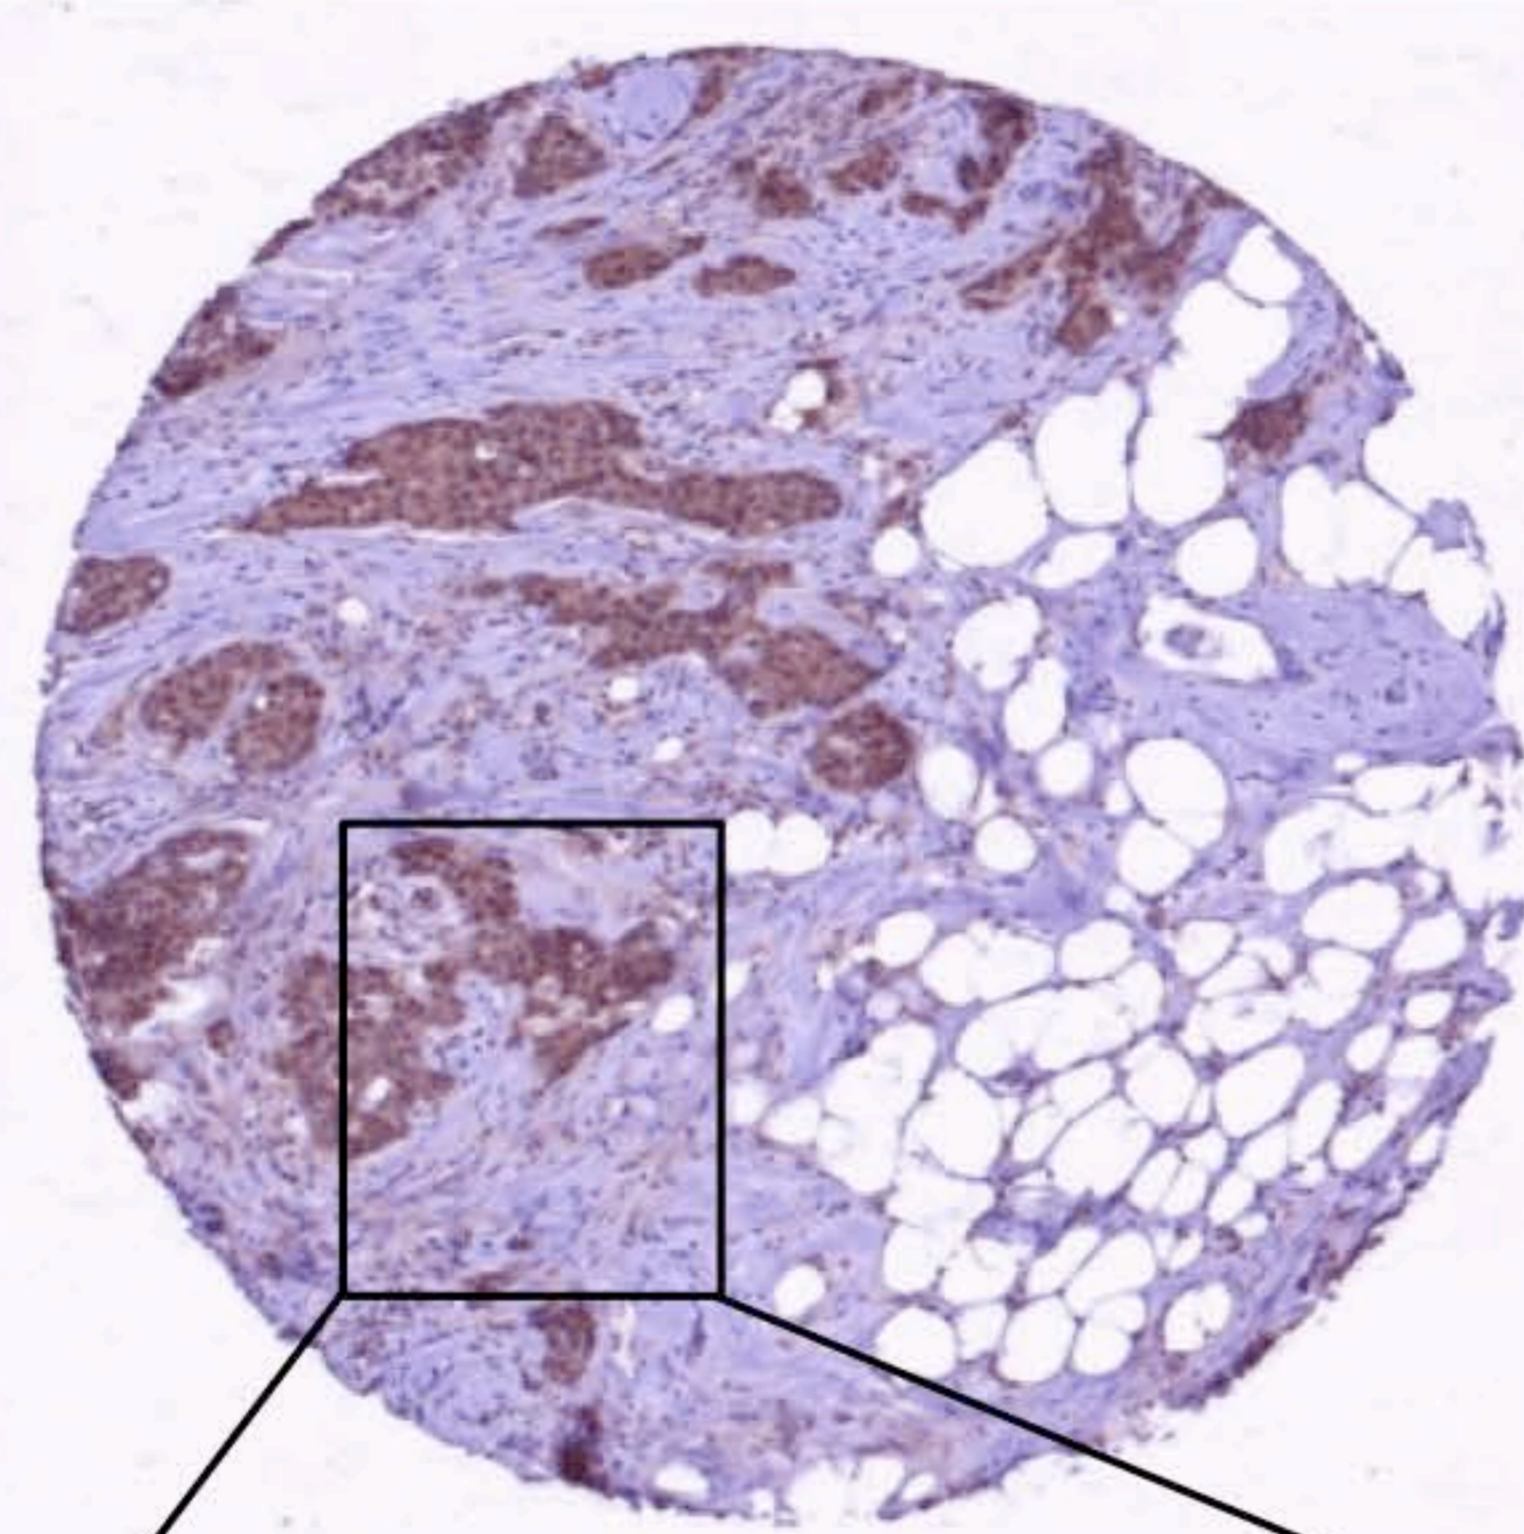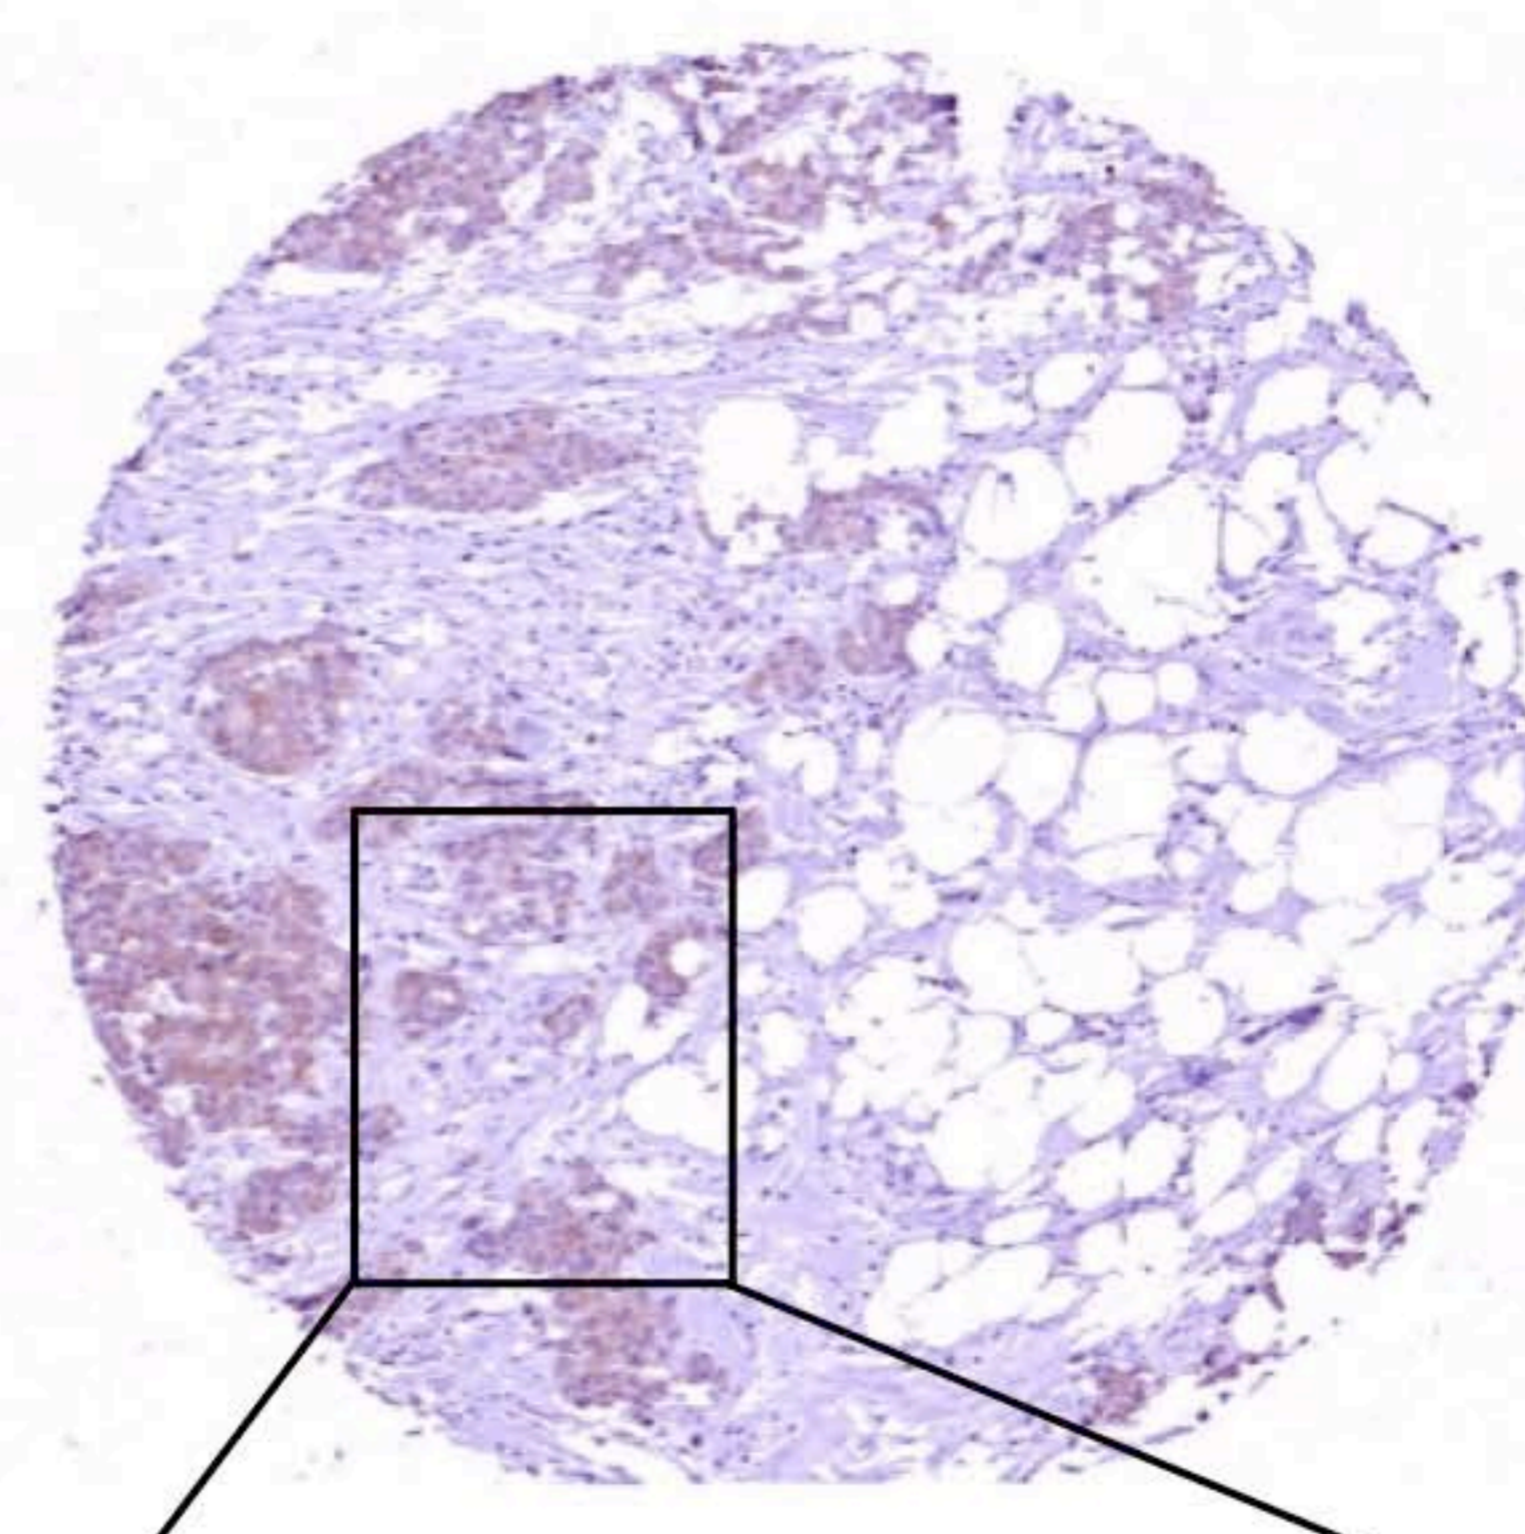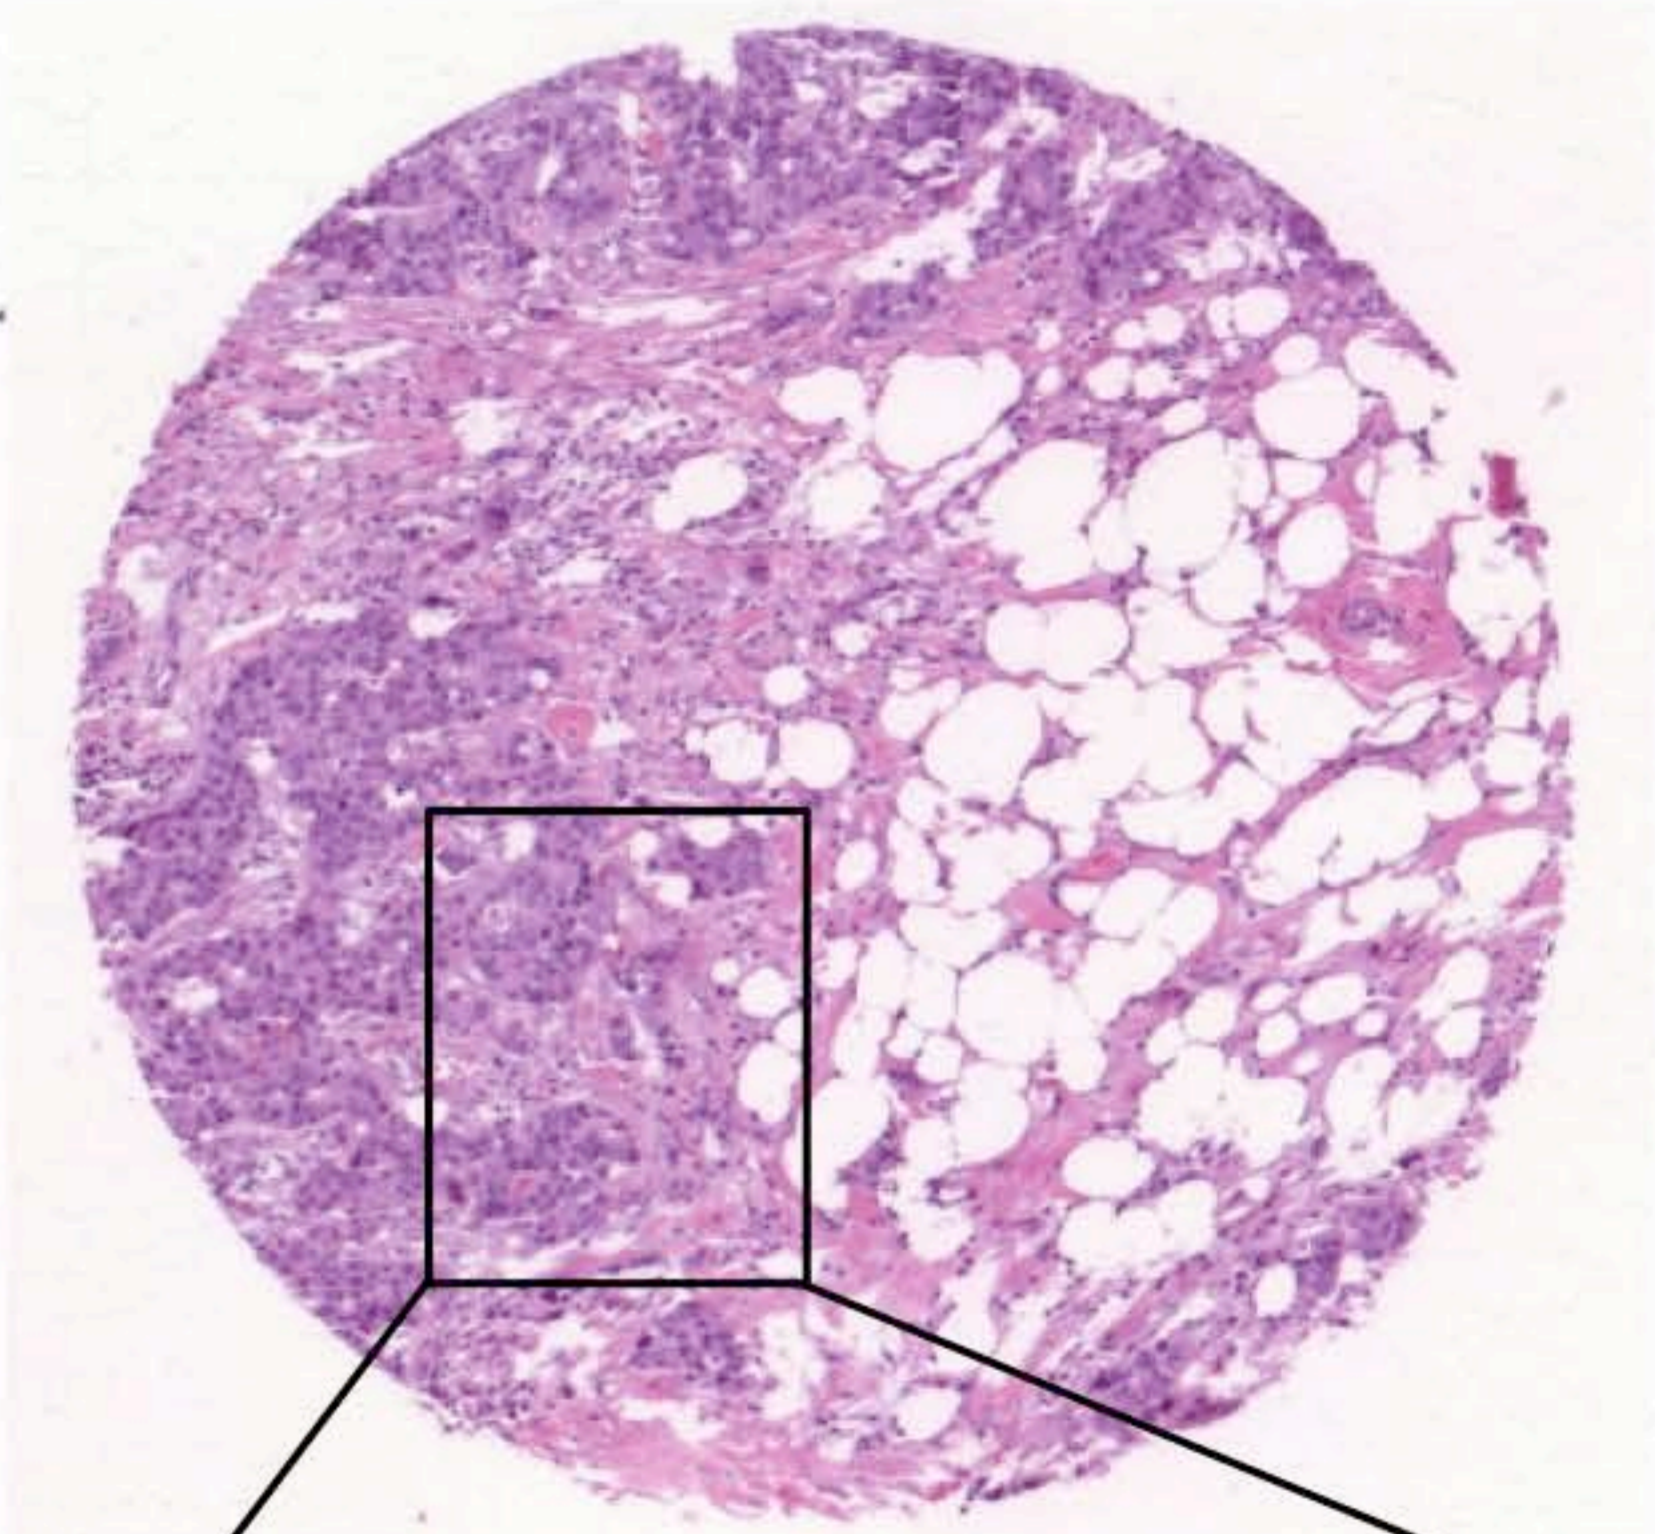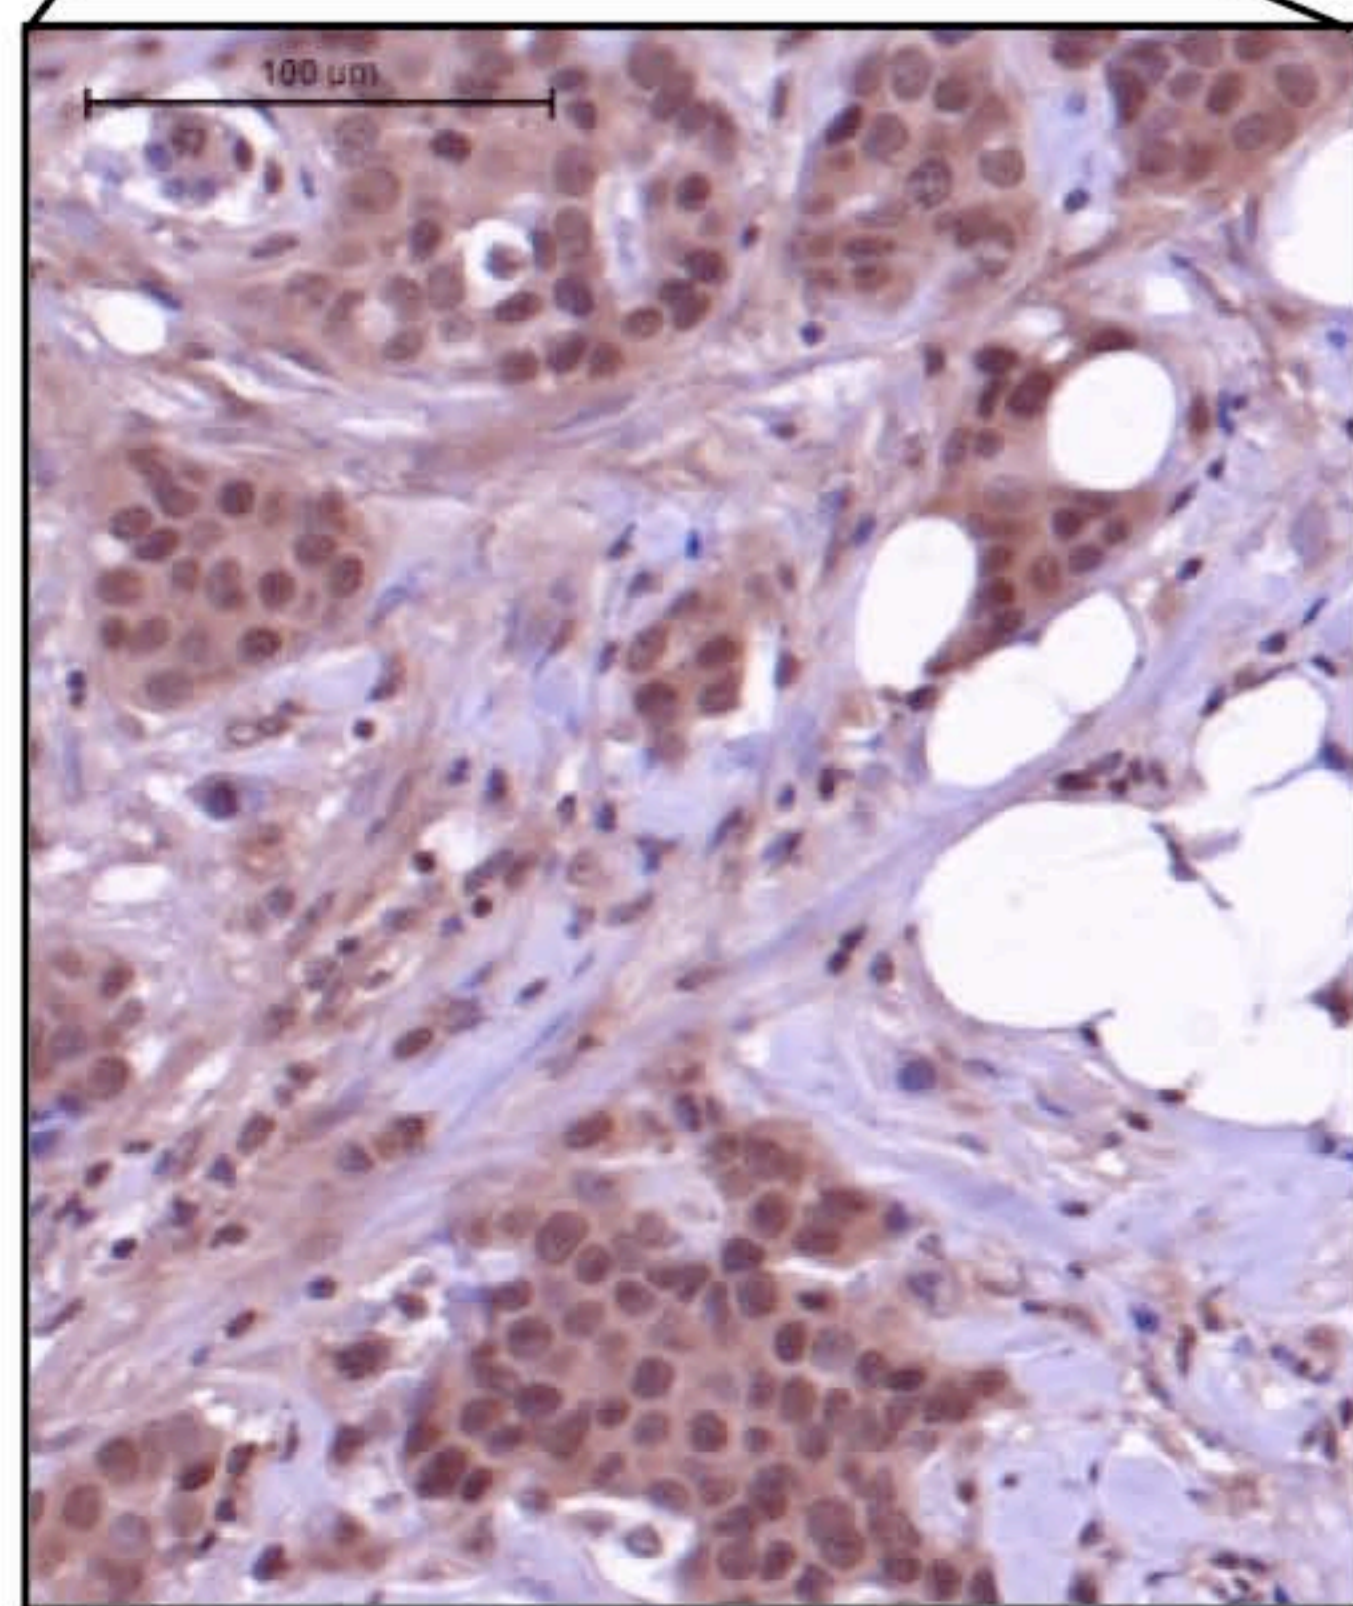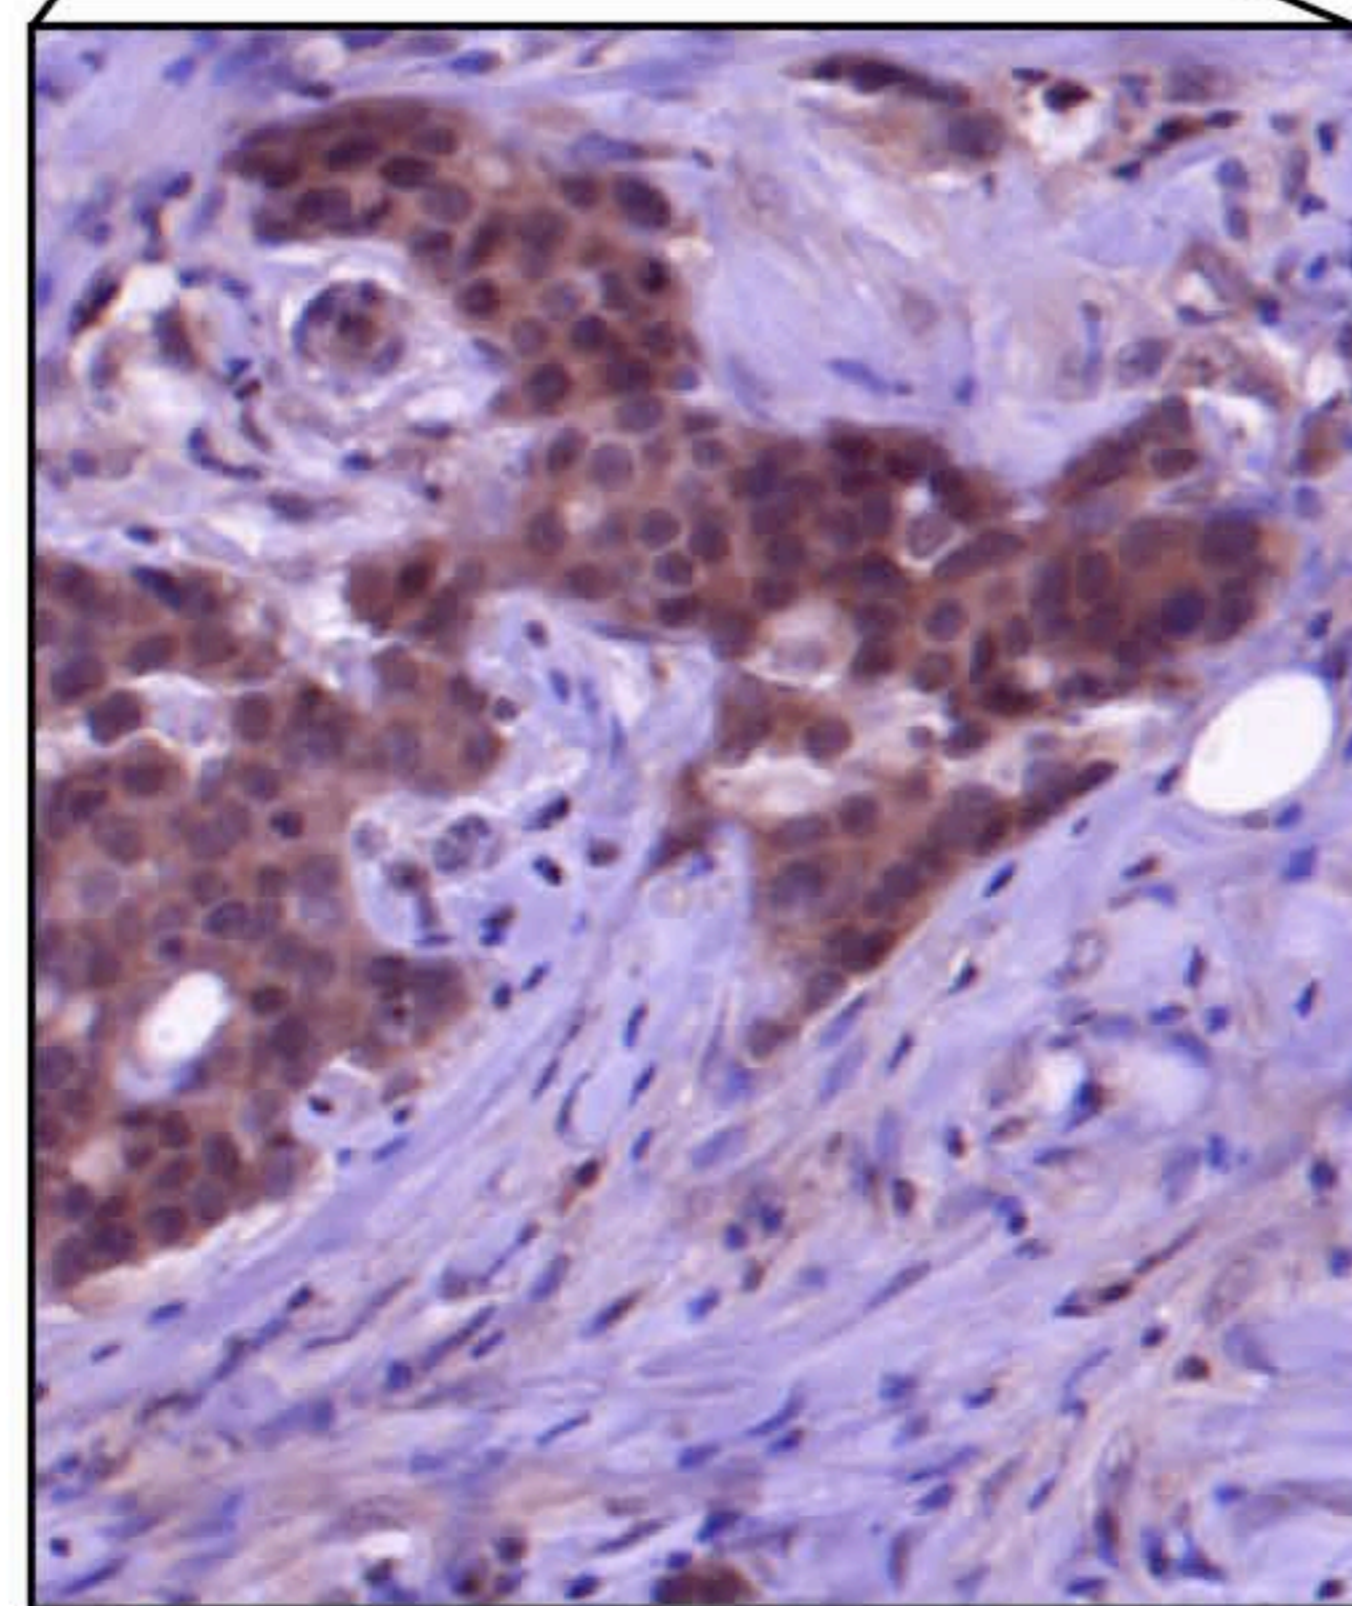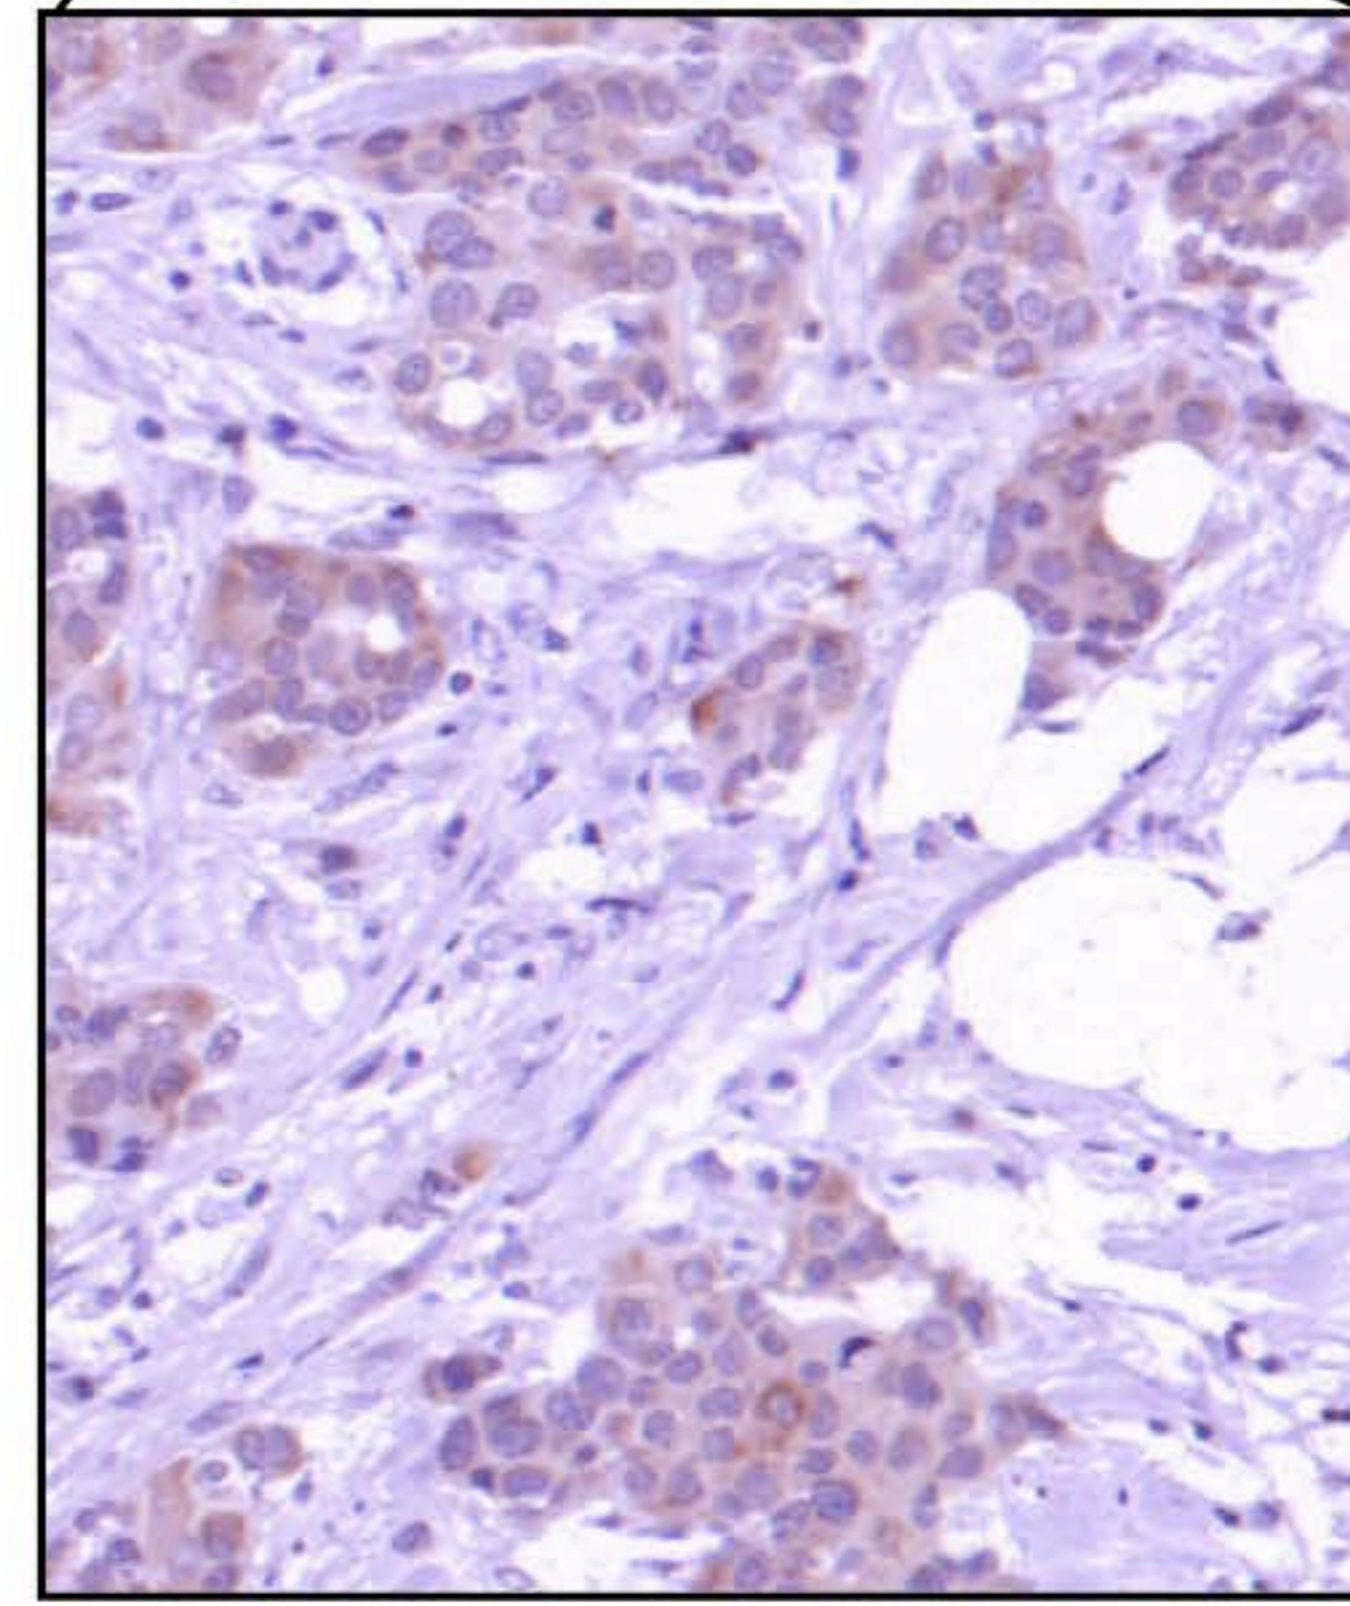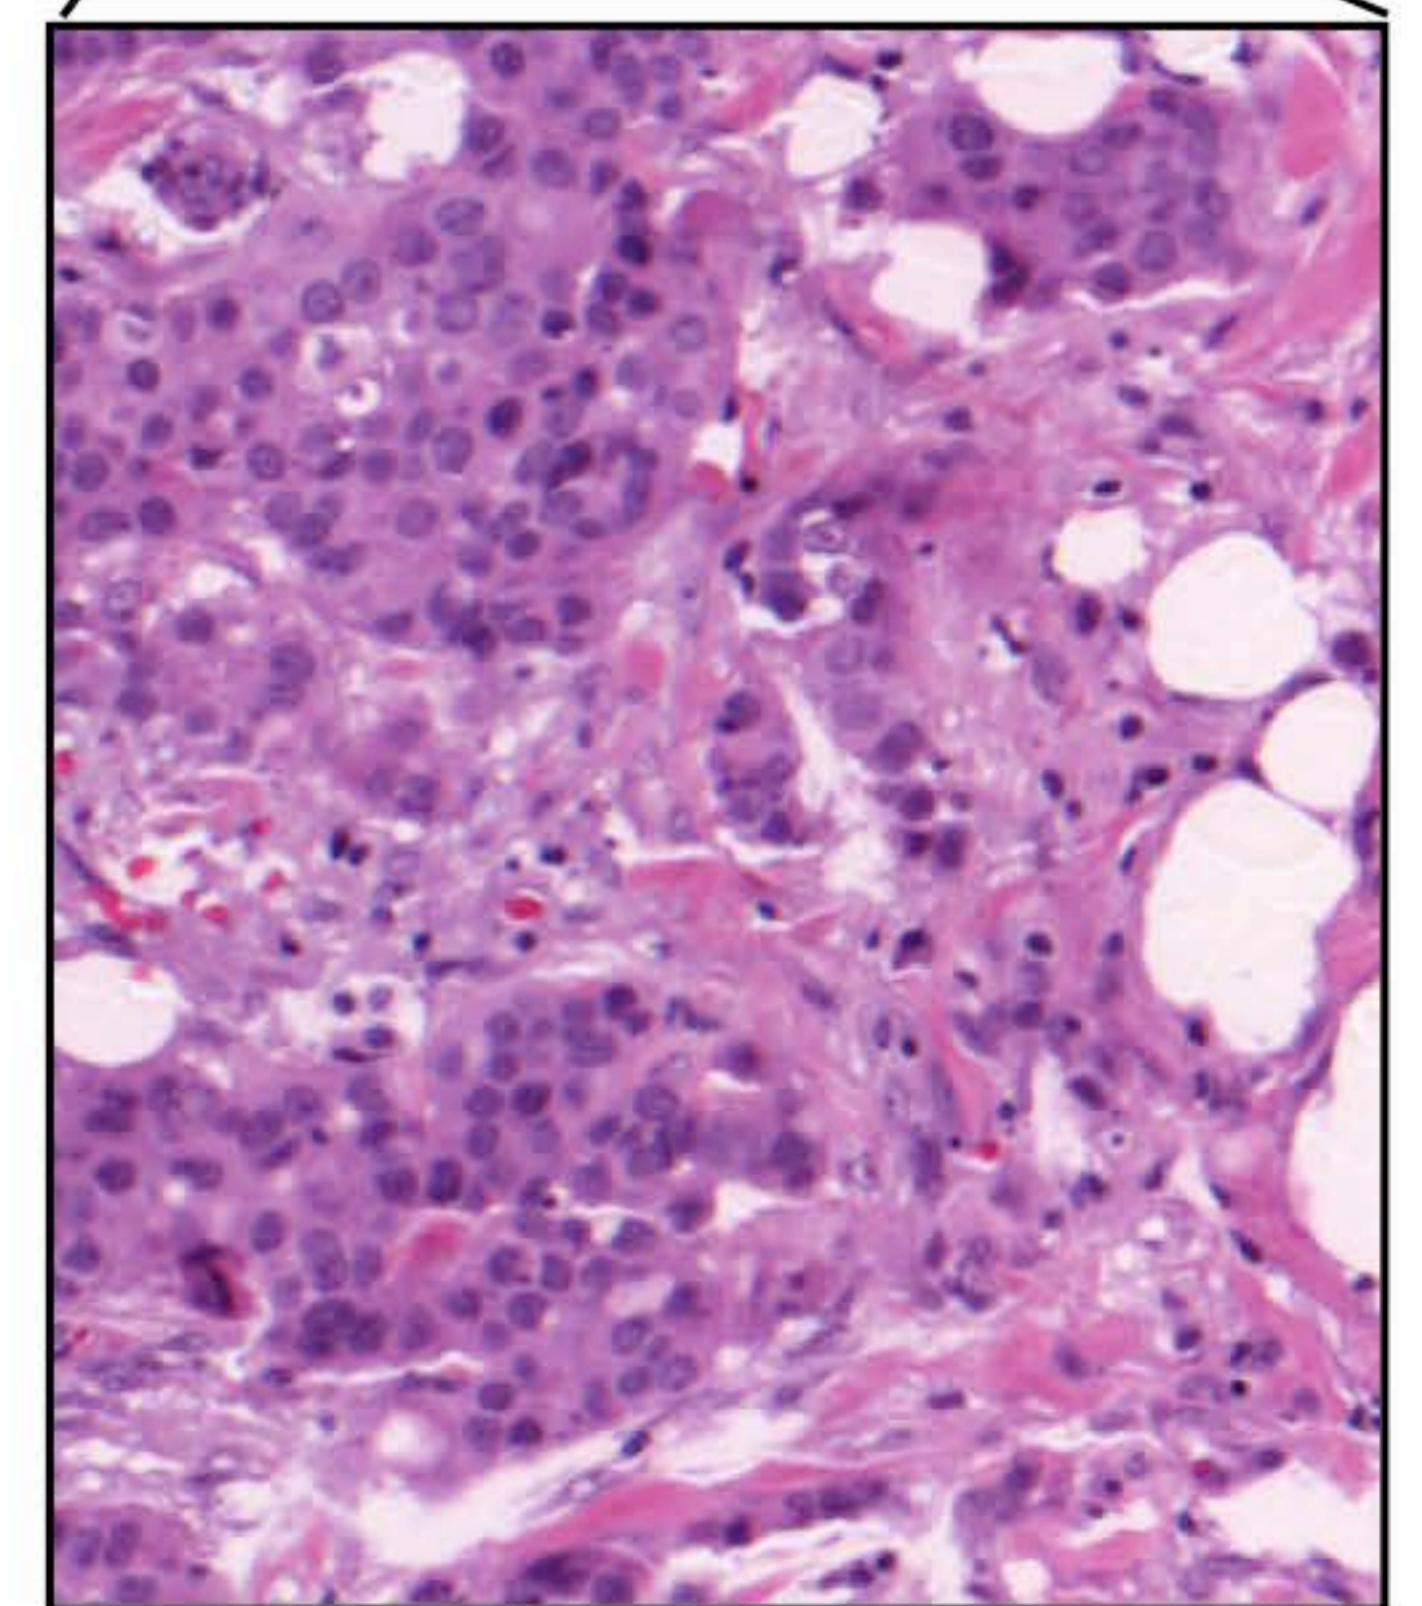

anti-BCA2

anti-hHR23a

anti-14-3-3 $\sigma$ 

H&amp;E

Supplement: MOESM3 [file 9464184]
